# Supplementary material
Source: PubMed Central journal article supplement (PMC10524759)

LU-01-0448

A.

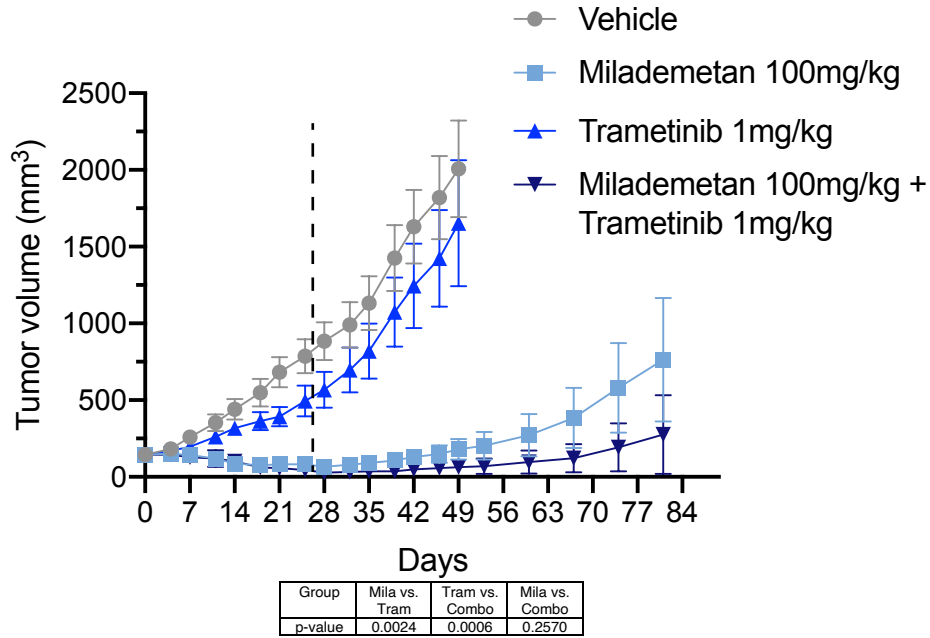

LU-01-0448

B.

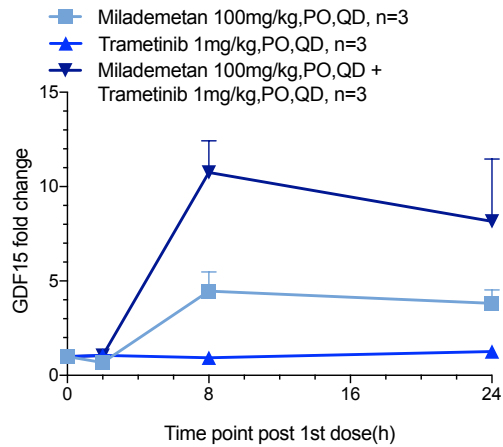

C.

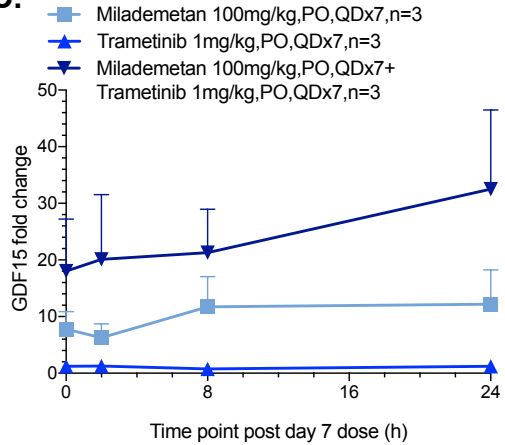

D.

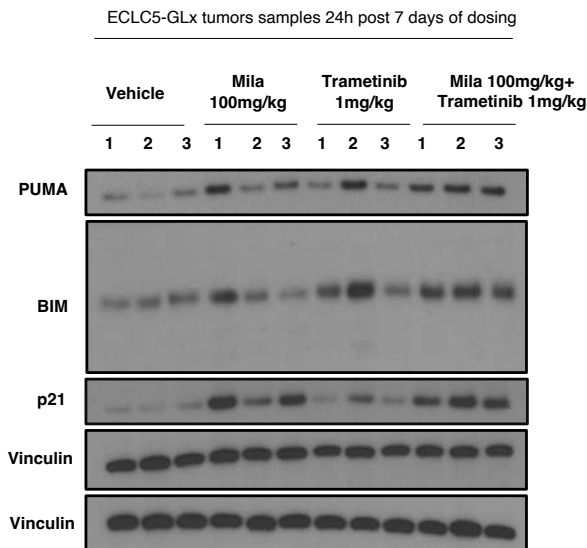

E.

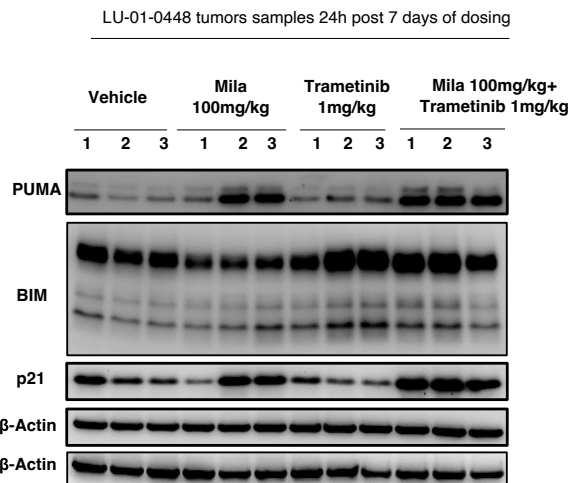

Supplement: NIHMS1902258-supplement-11.pdf [file NIHMS1902258-supplement-11.pdf]

# Supplemental Figure 8

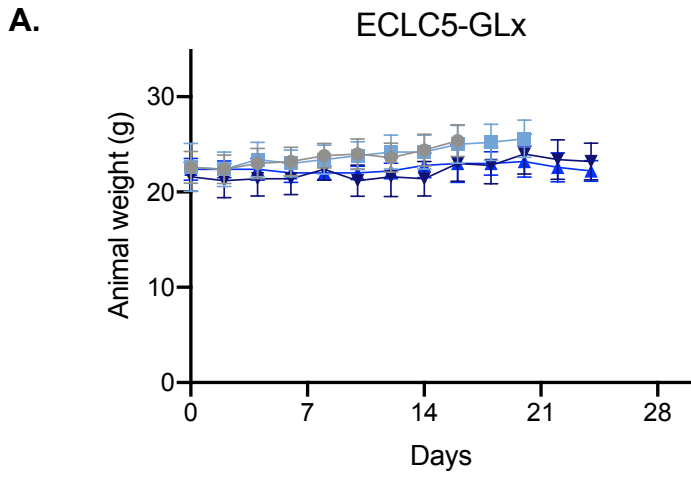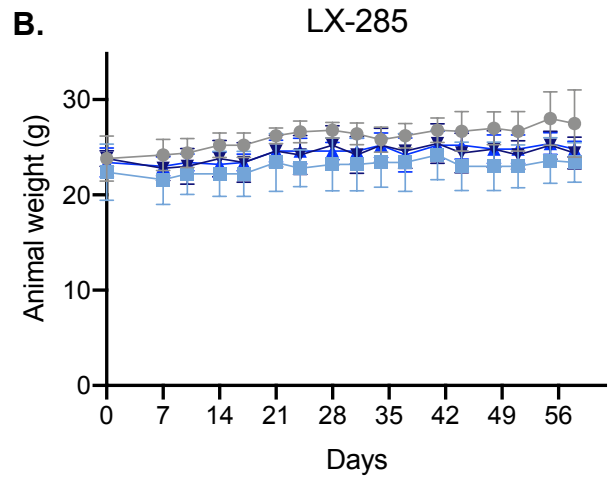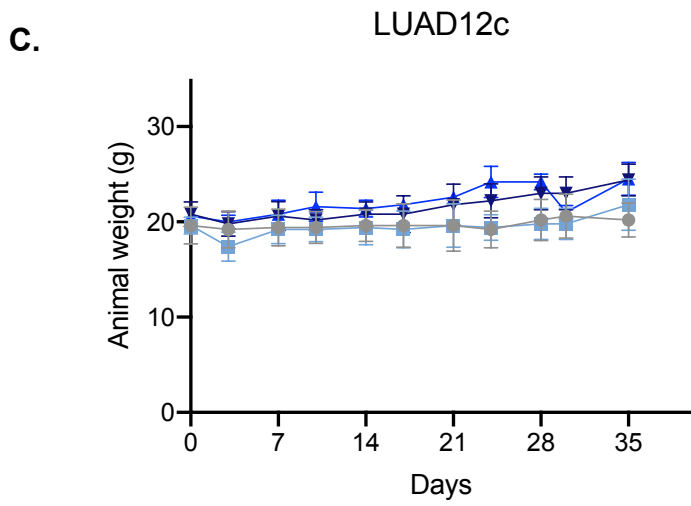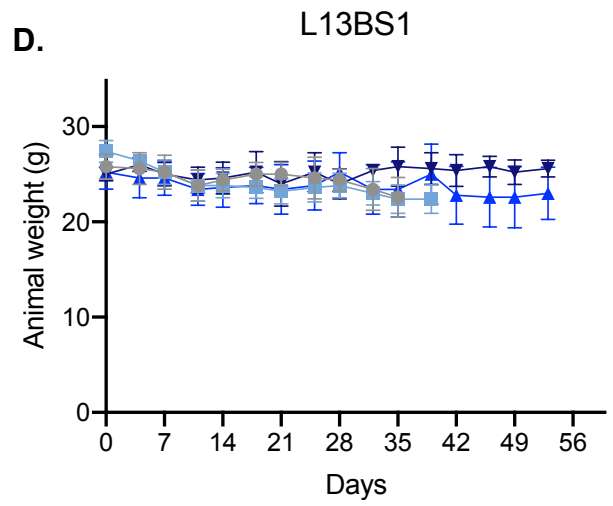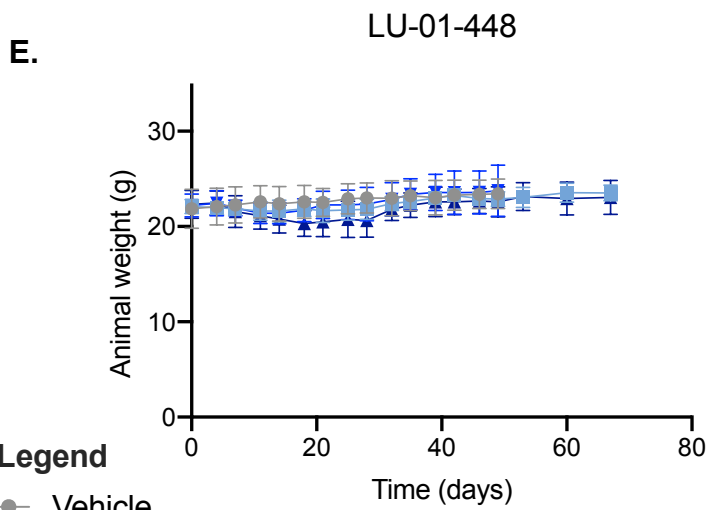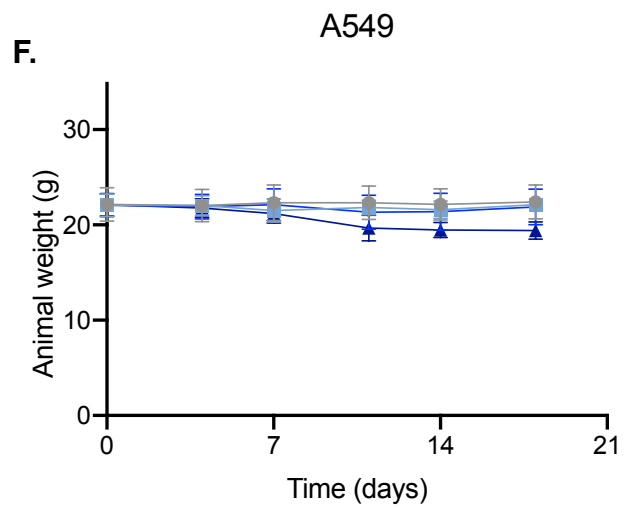

- Legend**
- Vehicle
  - Trametinib
  - ▲ Milademetan
  - ▼ Milademetan + Trametinib

Supplement: NIHMS1902258-supplement-12.pdf [file NIHMS1902258-supplement-12.pdf]

# Supplemental Figure 1

## H1395

## A549

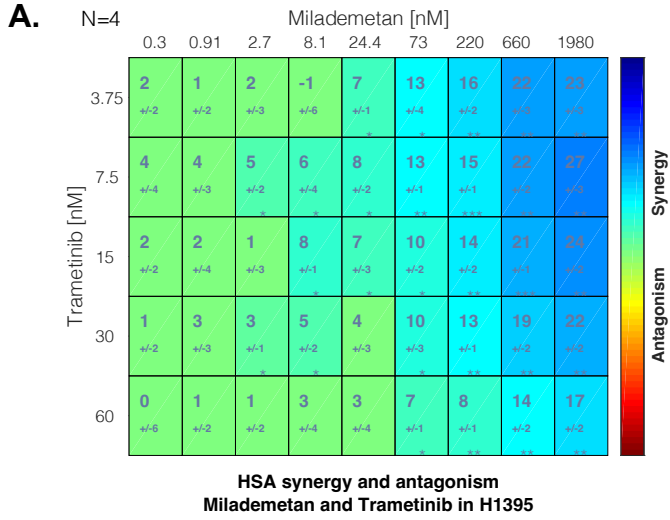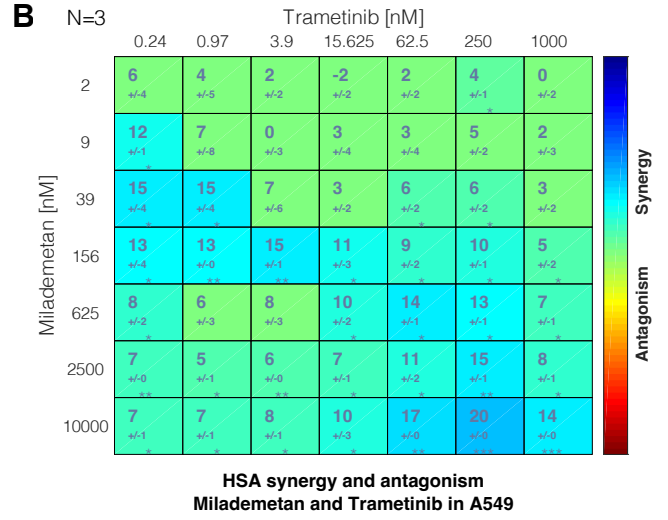

Supplement: NIHMS1902258-supplement-5.pdf [file NIHMS1902258-supplement-5.pdf]

## Supplemental Figure 2

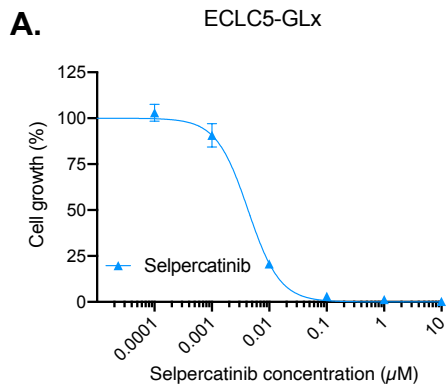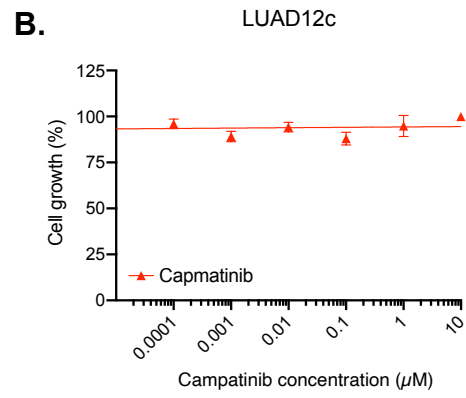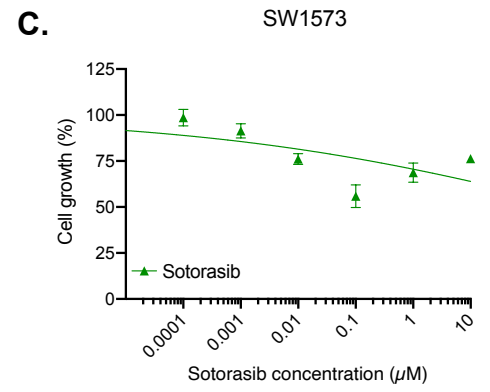

Supplement: NIHMS1902258-supplement-6.pdf [file NIHMS1902258-supplement-6.pdf]

### Supplemental Figure 3

A549 cell line (KRAS<sup>G12S</sup>, TP53 wild type, no MDM2amp)

---

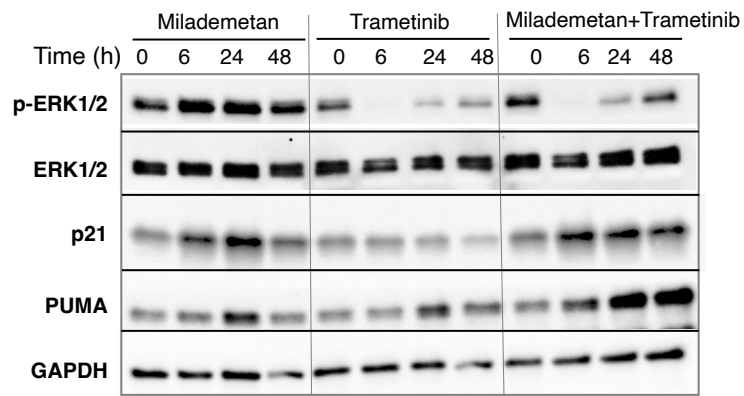

Supplement: NIHMS1902258-supplement-7.pdf [file NIHMS1902258-supplement-7.pdf]

Supplemental Figure 4

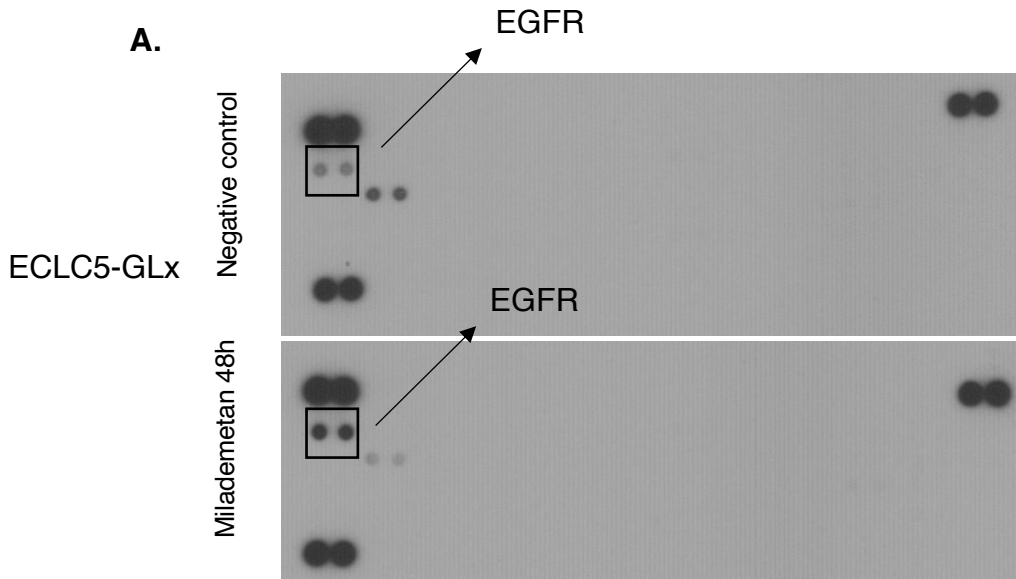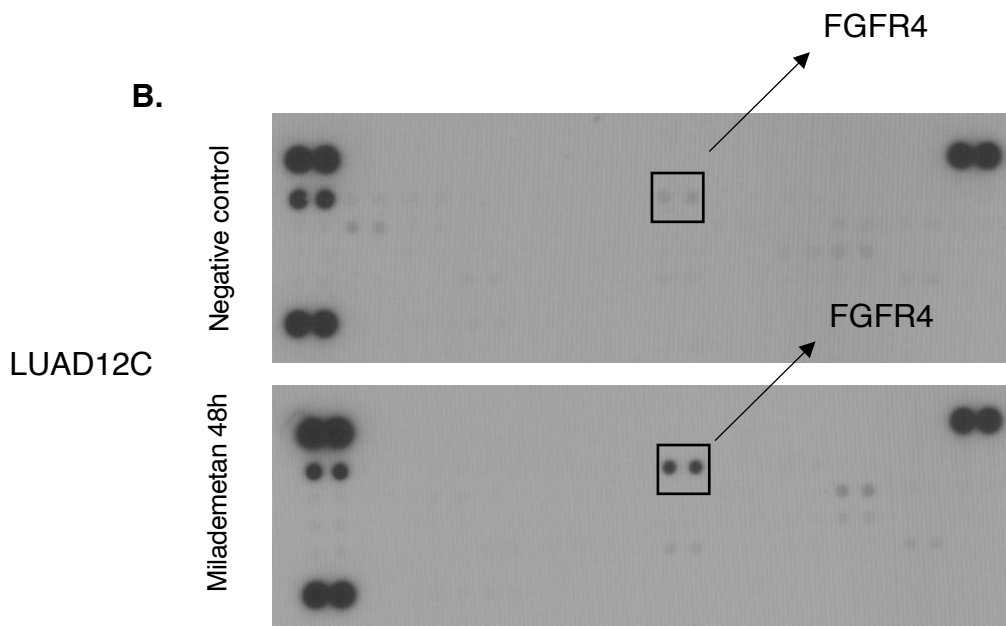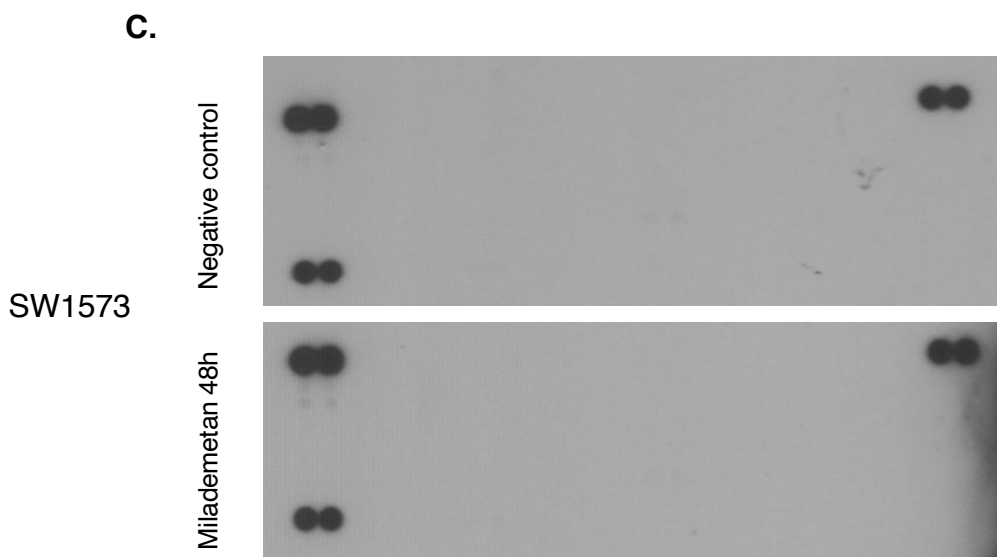

Supplement: NIHMS1902258-supplement-8.pdf [file NIHMS1902258-supplement-8.pdf]

# Supplemental Figure 5

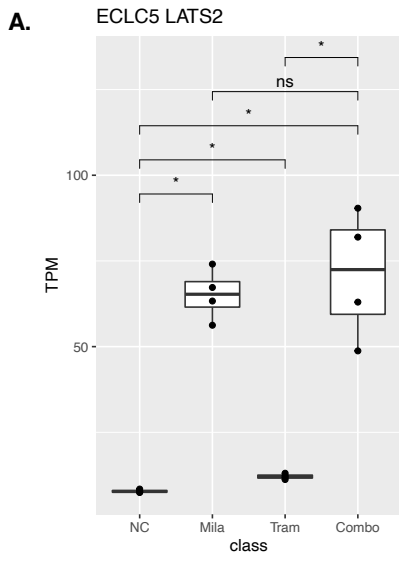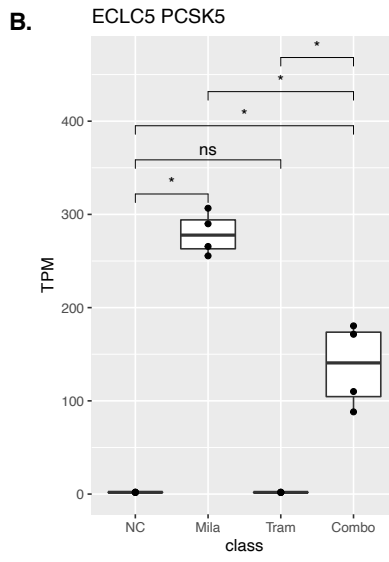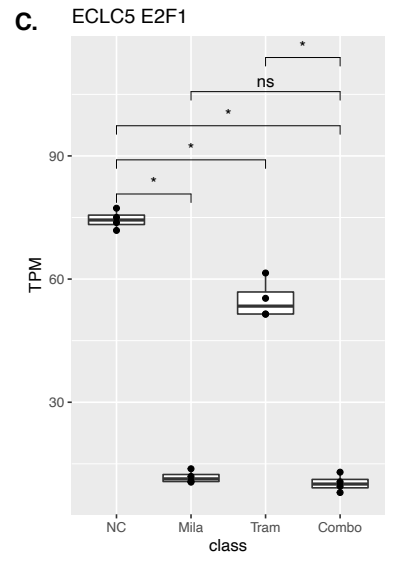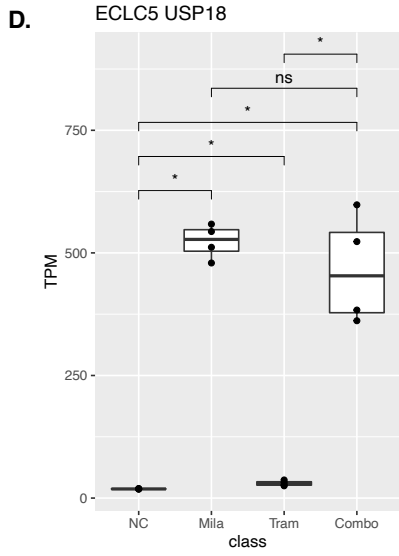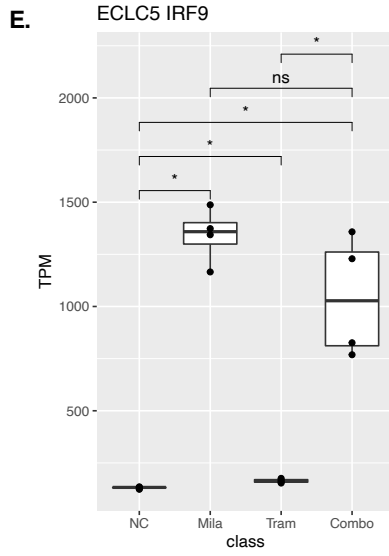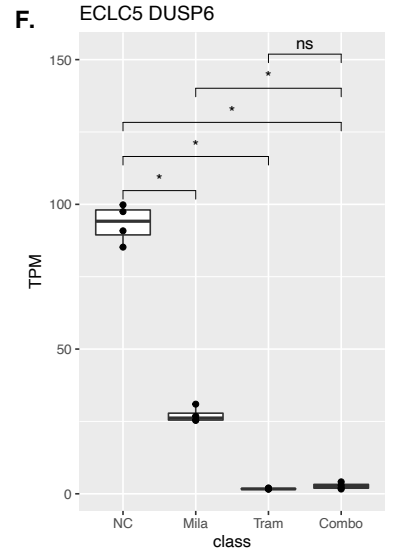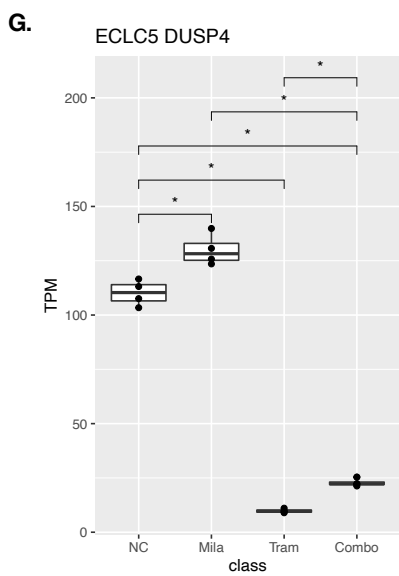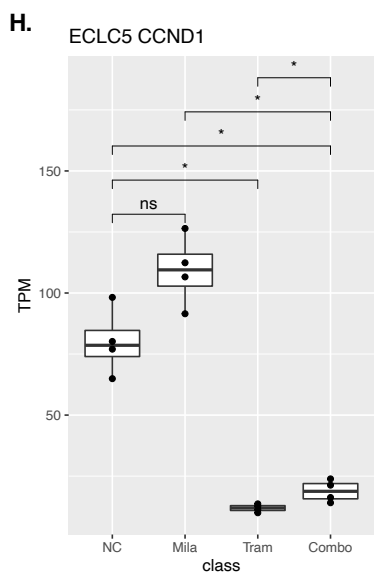

Supplement: NIHMS1902258-supplement-9.pdf [file NIHMS1902258-supplement-9.pdf]
